# Supplementary material for: Communicating Mass Spectrometry Quality Information in mzQC with Python, R, and Java
Source: PubMed Central journal article supplement (PMC11311537; doi:10.1021/jasms.4c00174), 2024-06-26
Supplement: js4c00174_si_001.pdf [file js4c00174_si_001.pdf]

# Supporting information for “Communicating mass spectrometry quality information in mzQC with Python, R, and Java”

Chris Bielow<sup>1,\*‡</sup>, Nils Hoffmann<sup>2,‡</sup>, David Jimenez-Morales<sup>3</sup>, Tim Van Den Bossche<sup>4,5</sup>, Juan Antonio Vizcaíno<sup>6</sup>, David L. Tabb<sup>7</sup>, Wout Bittremieux<sup>8</sup>, Mathias Walzer<sup>6,\*</sup>

‡ equal contribution

\* corresponding authors: [chris.bielow@bsc.fu-berlin.de](mailto:chris.bielow@bsc.fu-berlin.de), [walzer@ebi.ac.uk](mailto:walzer@ebi.ac.uk)

1. Bioinformatics Solution Center, Institut für Mathematik und Informatik, Freie Universität Berlin, Takustr. 9, 14195 Berlin, Germany
2. Institute for Bio- and Geosciences (IBG-5), Forschungszentrum Jülich GmbH, 52428 Jülich, Germany
3. Department of Medicine, Stanford University School of Medicine, Stanford, CA, USA
4. Department of Biomolecular Medicine, Faculty of Medicine and Health Sciences, Ghent University, Technologiepark-Zwijnaarde 75, 9052 Ghent, Belgium
5. VIB-UGent Center for Medical Biotechnology, VIB, Technologiepark-Zwijnaarde 75, 9052 Ghent, Belgium
6. European Molecular Biology Laboratory, EMBL-European Bioinformatics Institute (EMBL-EBI), Hinxton, Cambridge, CB10 1SD, United Kingdom
7. European Research Institute for the Biology of Ageing, University Medical Center Groningen, 9713 AV Groningen, the Netherlands
8. Department of Computer Science, University of Antwerp, 2020 Antwerpen, Belgium

**Supplementary Table 1:** QC metrics considered during the analysis and their accession numbers in the PSI-MS controlled vocabulary. The last column refers to the programming language used to compute the metrics.

| <b>Accession</b> | <b>Metric</b>                      | <b>Programming Language</b> |
|------------------|------------------------------------|-----------------------------|
| MS:1000505       | base peak intensity                | Java                        |
| MS:1002404       | count of identified proteins       | Python                      |
| MS:1003044       | number of missed cleavages         | Python                      |
| MS:1003250       | count of identified peptidofoms    | Python                      |
| MS:1003251       | count of identified spectra        | Python                      |
| MS:4000060       | number of MS2 spectra              | Python                      |
| MS:4000069       | m/z acquisition range              | Java                        |
| MS:4000070       | retention time acquisition range   | Java                        |
| MS:4000071       | number of chromatograms            | Java                        |
| MS:4000104       | total ion currents                 | Java                        |
| MS:4000132       | MS1 ion collection time mean       | R                           |
| MS:4000133       | MS1 ion collection time sigma      | R                           |
| MS:4000137       | MS2 ion collection time mean       | R                           |
| MS:4000138       | MS2 ion collection time sigma      | R                           |
| MS:4000178       | precursor ppm deviation mean       | Python                      |
| MS:4000179       | precursor ppm deviation sigma      | Python                      |
| MS:4000180       | table of missed cleavage counts    | Python                      |
| MS:4000181       | identified MS2 quarter RT fraction | Python                      |
